# Supplementary material for: Synergistic Combination of Irinotecan and Rapamycin Orally Delivered by Nanoemulsion for Enhancing Therapeutic Efficacy of Pancreatic Cancer
Source: MDPI journal article supplement (doi:10.3390/pharmaceutics15020473), 2023-01-31
Supplement: s1 [file s1]

# Synergistic Combination of Irinotecan and Rapamycin Orally Delivered by Nanoemulsion for Enhancing Therapeutic Efficacy of Pancreatic Cancer

Yu-Hsuan Liu, Ling-Chun Chen, Wen-Ting Cheng, Pu-Sheng Wei, Chien-Ming Hsieh, Ming-Thau Sheu, Shyr-Yi Lin, Hsiu-O Ho and Hong-Liang Lin

## Analytical graphs

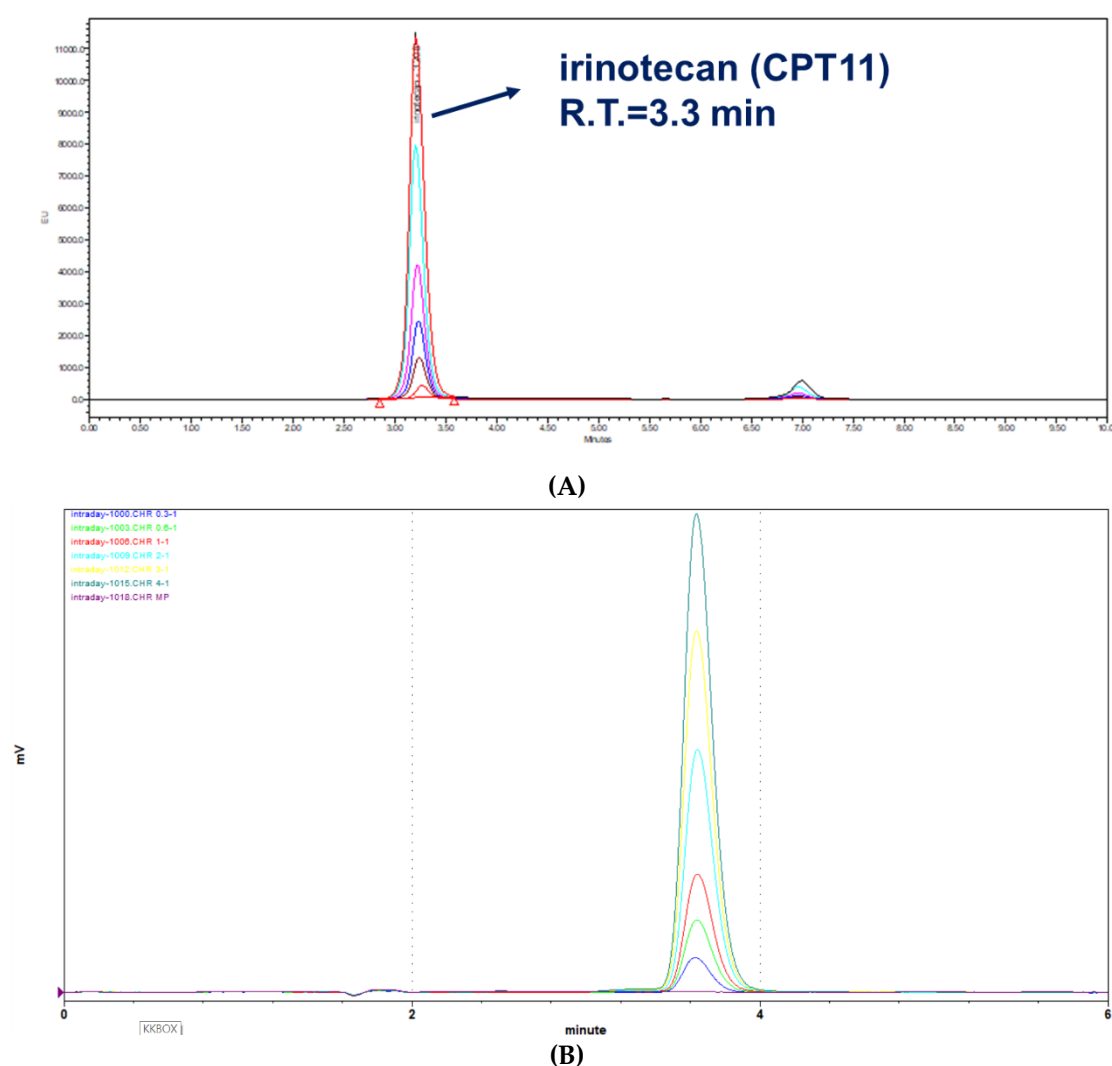

**Figure S1.** Analytical graphs of HPLC: (A) irinotecan, and (B) rapamycin.

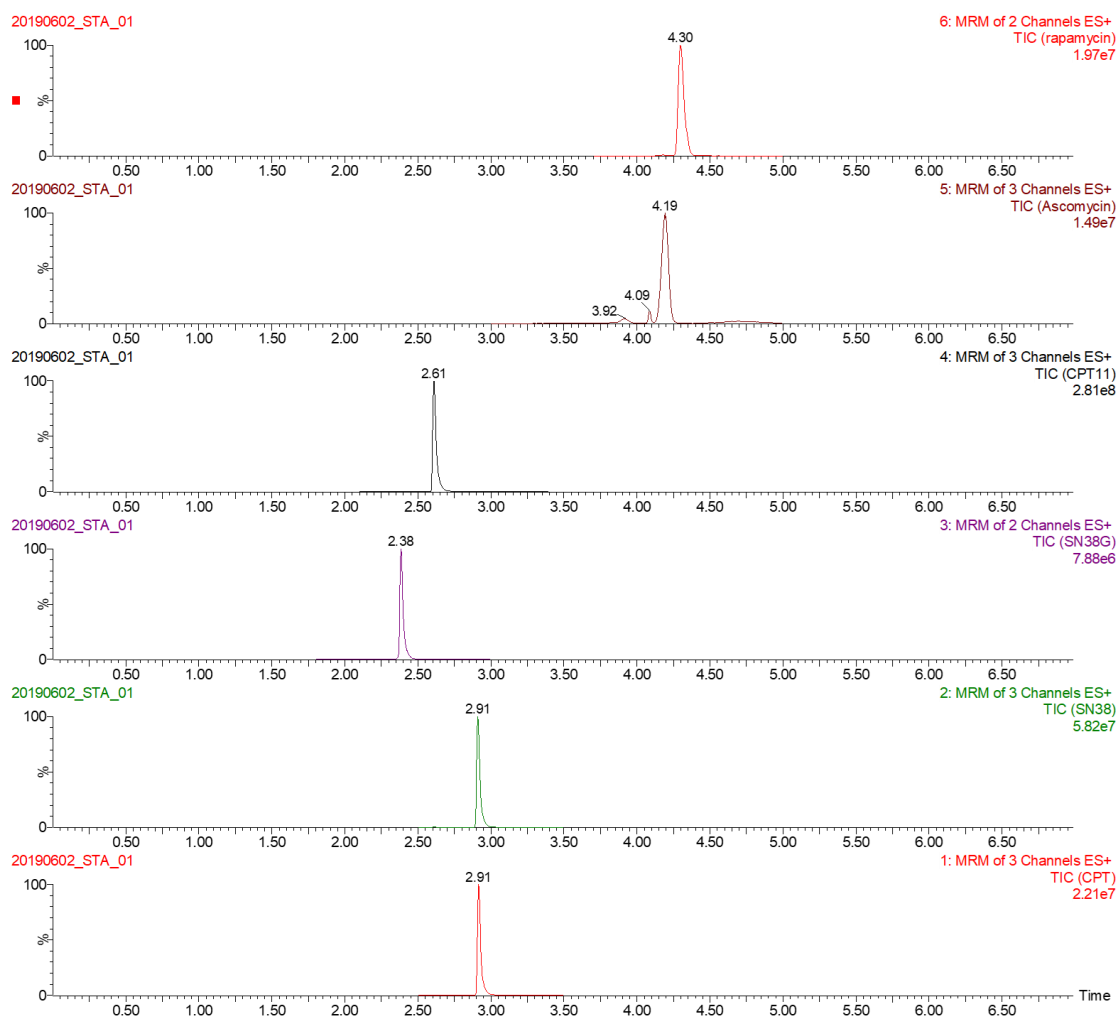

Figure S2. Analytical graphs of LCMS.
